## CORRIGENDUM

**Dissection of NT3 functions in vivo by gene replacement strategy**

Coppola, V., Kucera, J., Palko, M. E., Martinez-De Velasco, J., Lyons, W. E., Fritsch, B. and Tessarollo, L. *Development* **128**, 4315-4327.

The authors failed to acknowledge that the research was performed at the Veterans Affairs Boston Healthcare System, 150 South Huntington Avenue, Boston, MA 02130, USA and was supported by a Merit Review Award from VA Medical Research Service. Dr Jan Kucera sincerely regrets this inadvertent omission.
